# Supplementary material
Source: MDPI journal article supplement (https://www.mdpi.com/2071-1050/14/6/3212)
Supplement: s1 [file s1 › sustainability-1623513-supplementary.pdf]

# Understanding the Survival Ability of Franchise Industries during the COVID-19 Crisis in Malaysia

Nurul Ashykin Abd Aziz <sup>1,\*</sup>, Mohd Hizam-Hanafiah <sup>2</sup>, Hasif Rafidee Hasbollah <sup>3</sup>, Zuraimi Abdul Aziz <sup>1</sup> and Nik Syuhailah Nik Hussin <sup>1</sup>

## Part A. General Questions.

1. How long has it been since the establishment of your agency/business company?
2. What is your agency/company sector?
  - (i) franchisor
  - (ii) government
  - (iii) private
3. What is the main role/function of your agency/company?
4. Did your agency/company operate during the Covid-19 pandemic?
5. How did your agency/company operate when the government enforced movement control orders during the Covid-19 outbreak?

## Part B. Roles of franchise-related agencies.

| Research Questions                                                                                                               | Questions                                                                                                                    |
|----------------------------------------------------------------------------------------------------------------------------------|------------------------------------------------------------------------------------------------------------------------------|
| How franchise-related agencies play their roles in the survival of the Malaysian home-grown franchises during a pandemic crisis? | What is the main driving force of your agency/company when faced with a Covid-19 pandemic situation?                         |
|                                                                                                                                  | What kind of help do you offer/ expect as a related agency/ franchisor during this pandemic season?                          |
|                                                                                                                                  | How did the Covid-19 pandemic motivate you to play a role in helping the franchise industry?                                 |
|                                                                                                                                  | What activities do you offer/hope to help the survival of the franchise business during a pandemic?                          |
|                                                                                                                                  | What is your function as a franchise-related agency/franchisor in formulating strategies for survival during a pandemic?     |
|                                                                                                                                  | What are the driving factors for a franchise business to survive a pandemic?                                                 |
|                                                                                                                                  | How do these factors influence the strategy of related agencies?                                                             |
|                                                                                                                                  | What elements need to be considered before planning a strategy and helping the franchise industry during the pandemic phase? |
